# Supplementary material for: Distinct mRNAs in Cancer Extracellular Vesicles Activate Angiogenesis and Alter Transcriptome of Vascular Endothelial Cells
Source: MDPI journal article supplement (doi:10.3390/cancers13092009), 2021-04-22
Supplement: s1 [file s1]

Article

# Supplementary Materials: Distinct mRNAs in Cancer Extracellular Vesicles Activate Angiogenesis and Alter Transcriptome of Vascular Endothelial Cells

Pan Zhang, Su Bin Lim, Kuan Jiang, Ti Weng Chew, Boon Chuan Low and Chwee Teck Lim

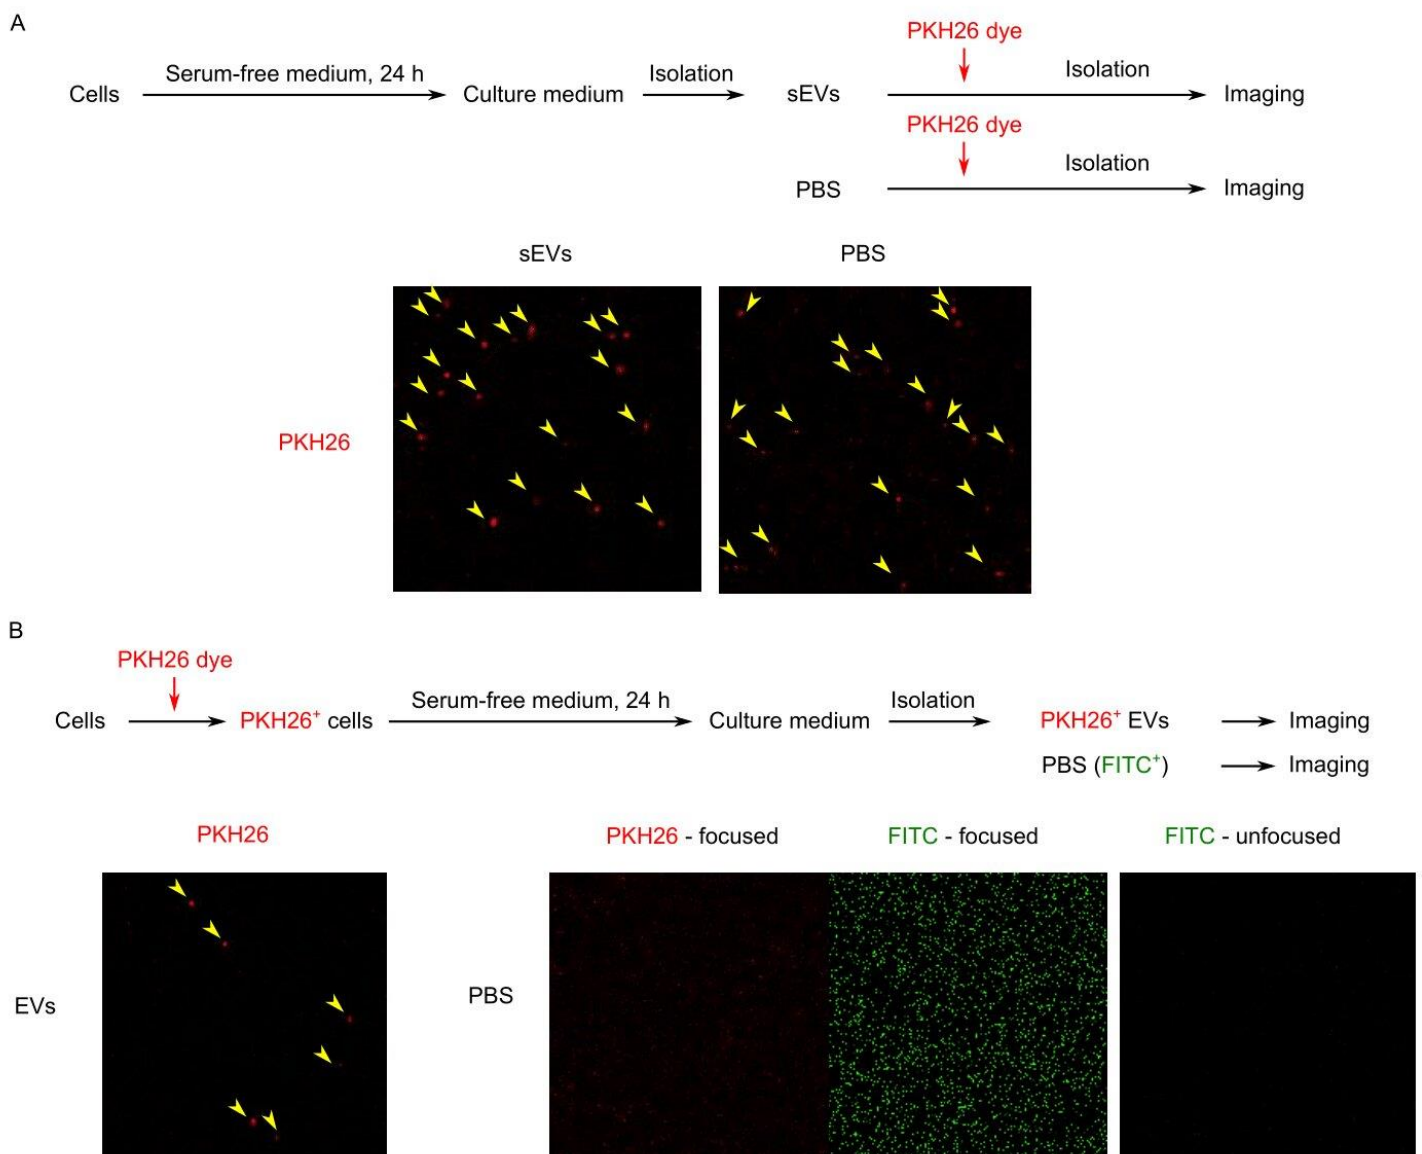

**Figure S1.** Comparison of two methods of EVs staining with PKH26. **(A)** Staining of EVs with direct mixing of EVs and PKH26 dye resulted in excessive dye that co-isolated with EVs and mimicked EVs in fluorescent imaging since abundant EV-like spots were identified in PBS control sample. **(B)** Cells that were stained with PKH26 dye generated PKH26<sup>+</sup> EVs. Excessive dye was thoroughly wash off after cell staining. PBS control showed no fluorescence.

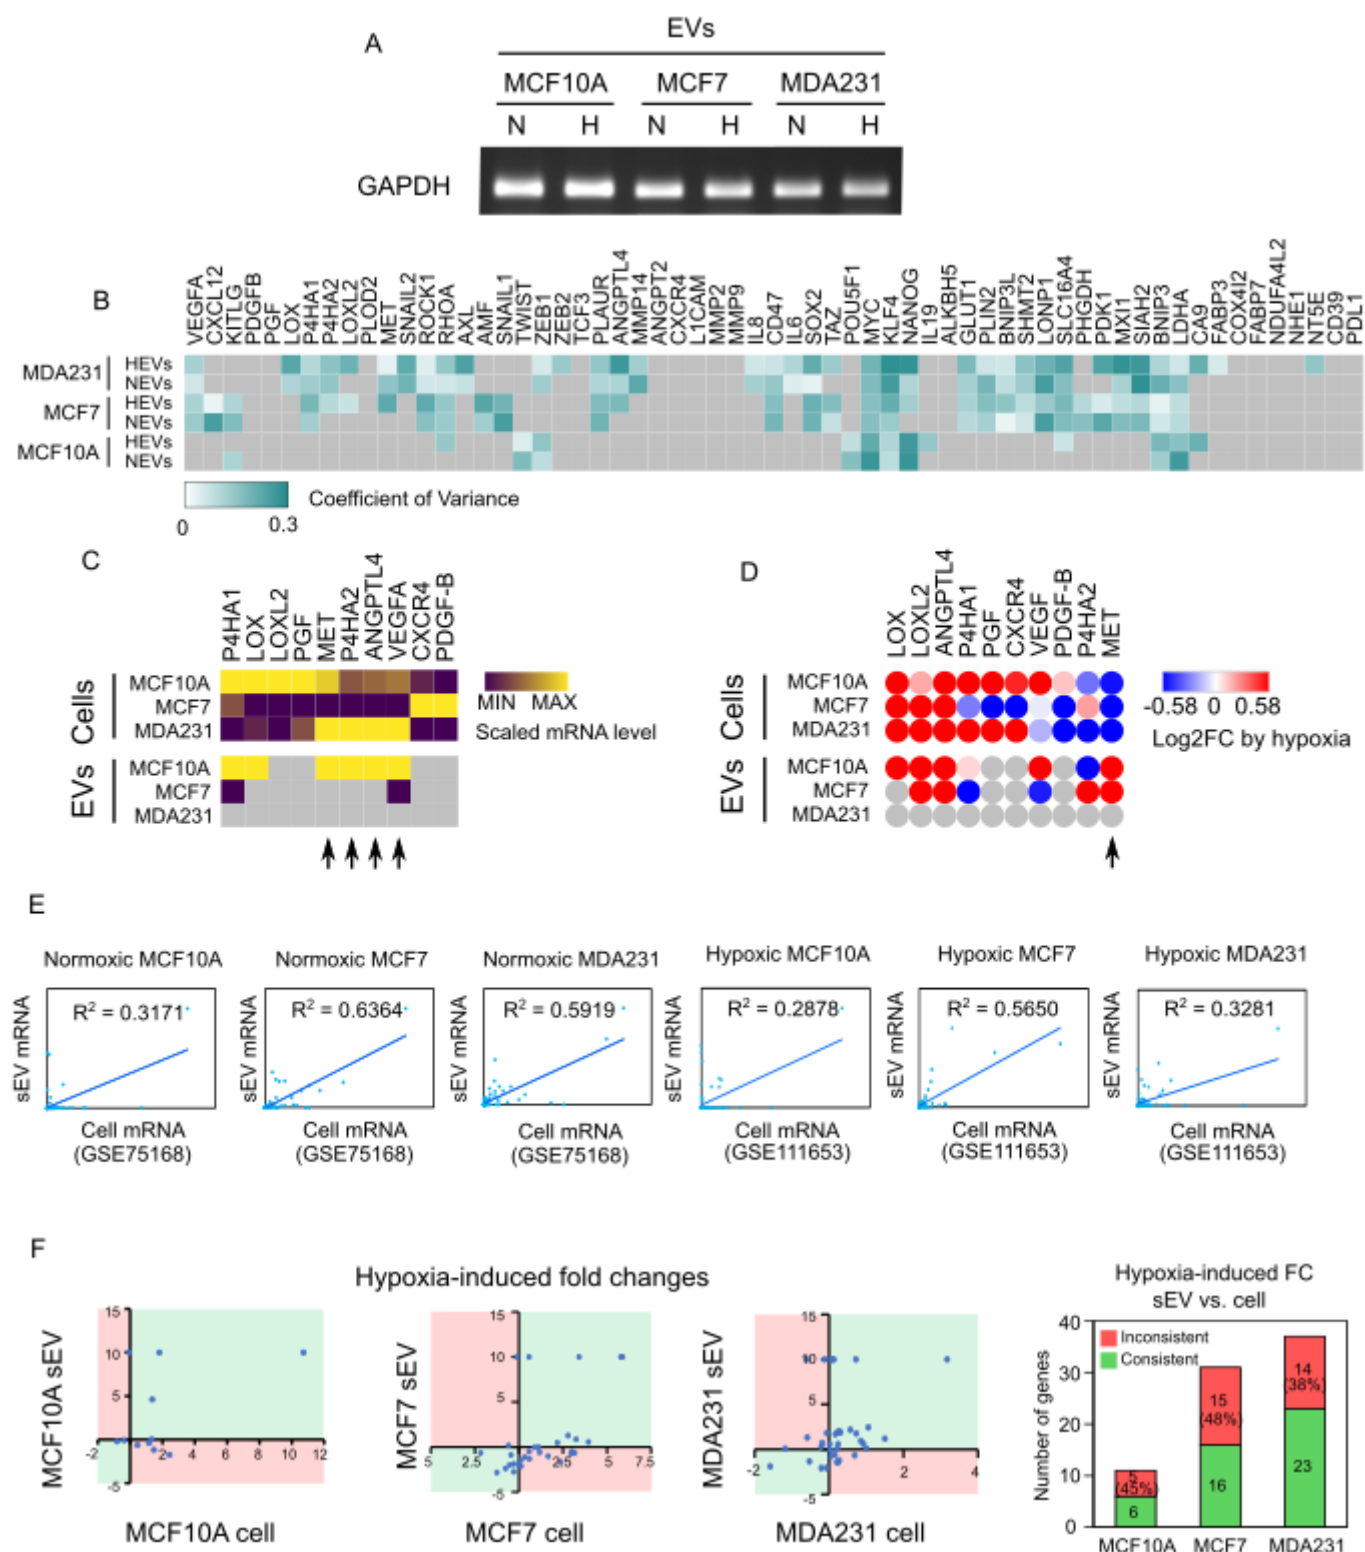

**Figure S2.** Comparison of mRNA profile between EVs and cells. (A) GAPDH mRNA was robustly present in all the quantified EVs. (B) The coefficient of variances of all gene expressions were less than 0.3, demonstrating that the exosomal mRNA levels were homeostatic, and the quantification of exosomal mRNA by RT-qPCR was reproducible. (C) Comparison of gene expressions in cells and EVs. The expression levels were normalized to GAPDH. (D) Comparison of hypoxia induced alterations of mRNA level in cells and EVs. (E) Expression correlation plot of hypoxia gene panel between EVs and cells. The R-squared values were calculated with linear regression. (F) The relationship of the hypoxia-induced gene expression fold change between EVs and cells.

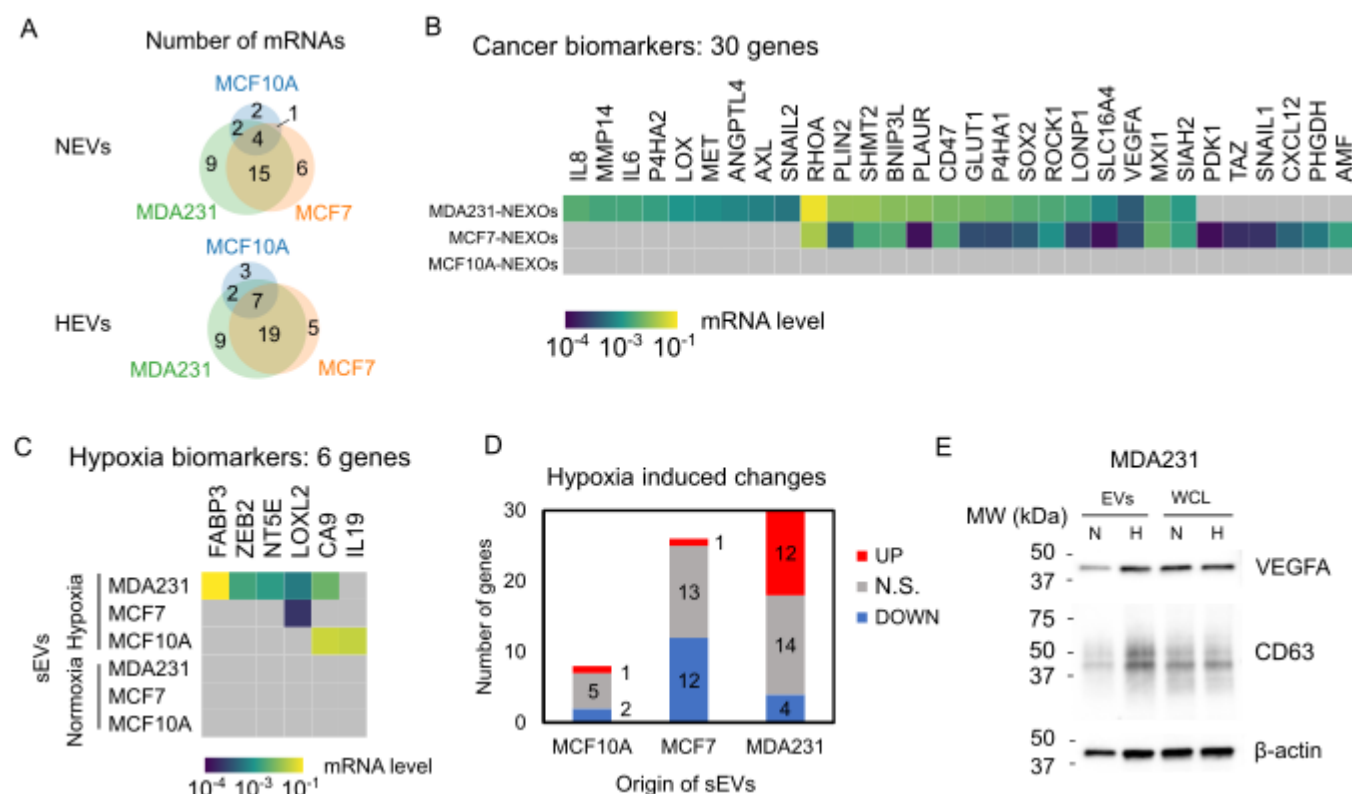

**Figure S3.** Analysis of exosomal mRNA profile of the hypoxia gene panel. **(A)** Venn diagram shows the presence of mRNAs of the hypoxia gene panel in normoxic EVs (NEVs) and hypoxic EVs (HEVs). **(B)** 30 genes from the hypoxia gene panel were potential cancer biomarker since their mRNAs were found present in cancer EVs while absent in MCF10A EVs. **(C)** 6 genes from the hypoxia gene panel can potentially reflect the hypoxic status of the tumor microenvironment as their mRNAs were only present in hypoxic EVs. **(D)** The number of mRNAs that were upregulated, downregulated or not significantly altered by hypoxic stress. Of the significantly regulated genes, most were downregulated in MCF7 and upregulated in MDA231. **(E)** Western blot shows that the VEGFA protein level in cells (normalized to  $\beta$ -actin) and in EVs (normalized to CD63) were not changes by the hypoxic stimulus.

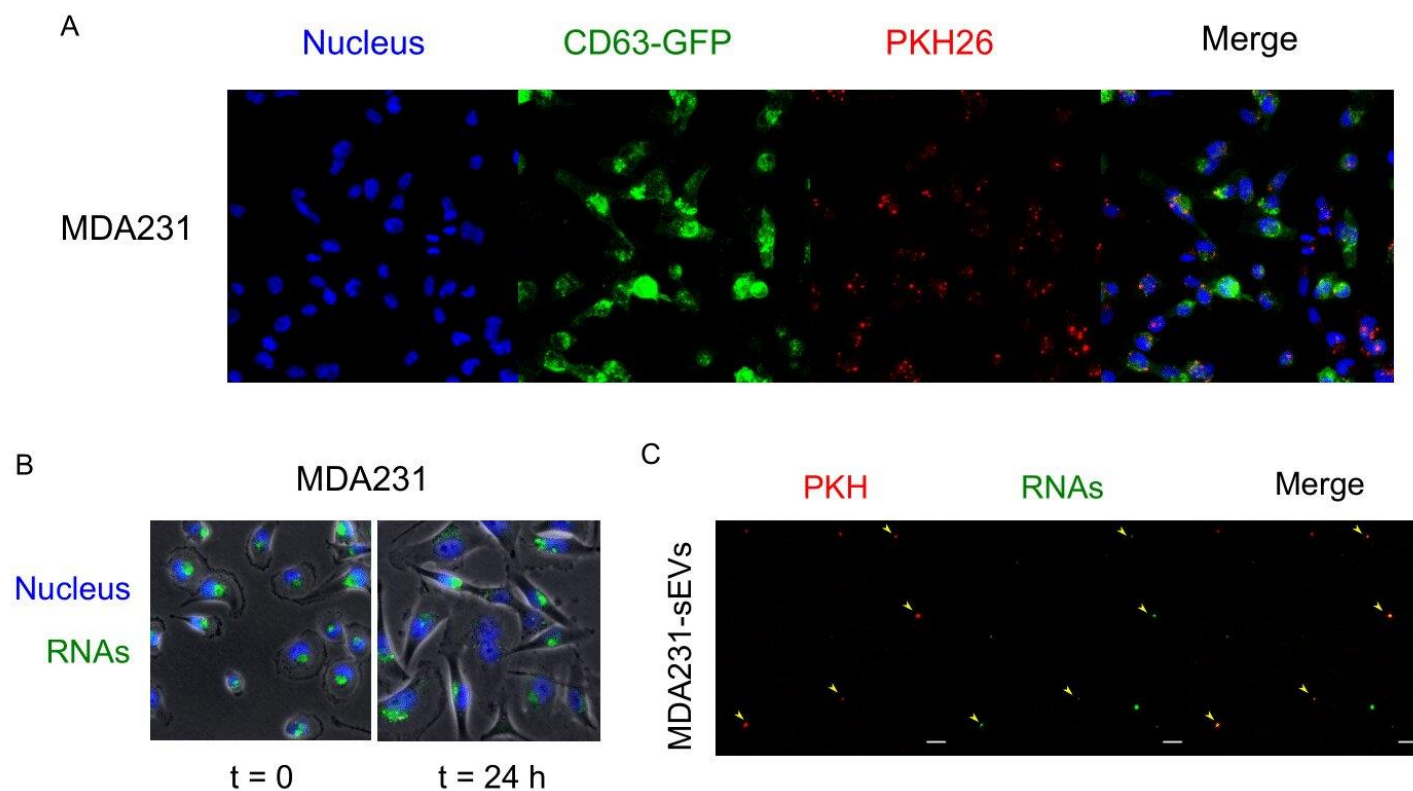

**Figure S4.** Fluorescent staining of CD63 and RNAs in MDA231 cell and EVs. (A) CD63-GFP and PKH26 efficiently label MDA231 cells. (B) The SYTO RNaselect specifically stained cell RNAs and lasted for more than 24 hours. (C) MDA231-derived PKH26<sup>+</sup> EVs carry RNAs as they can be stained by SYTO RNaselect.

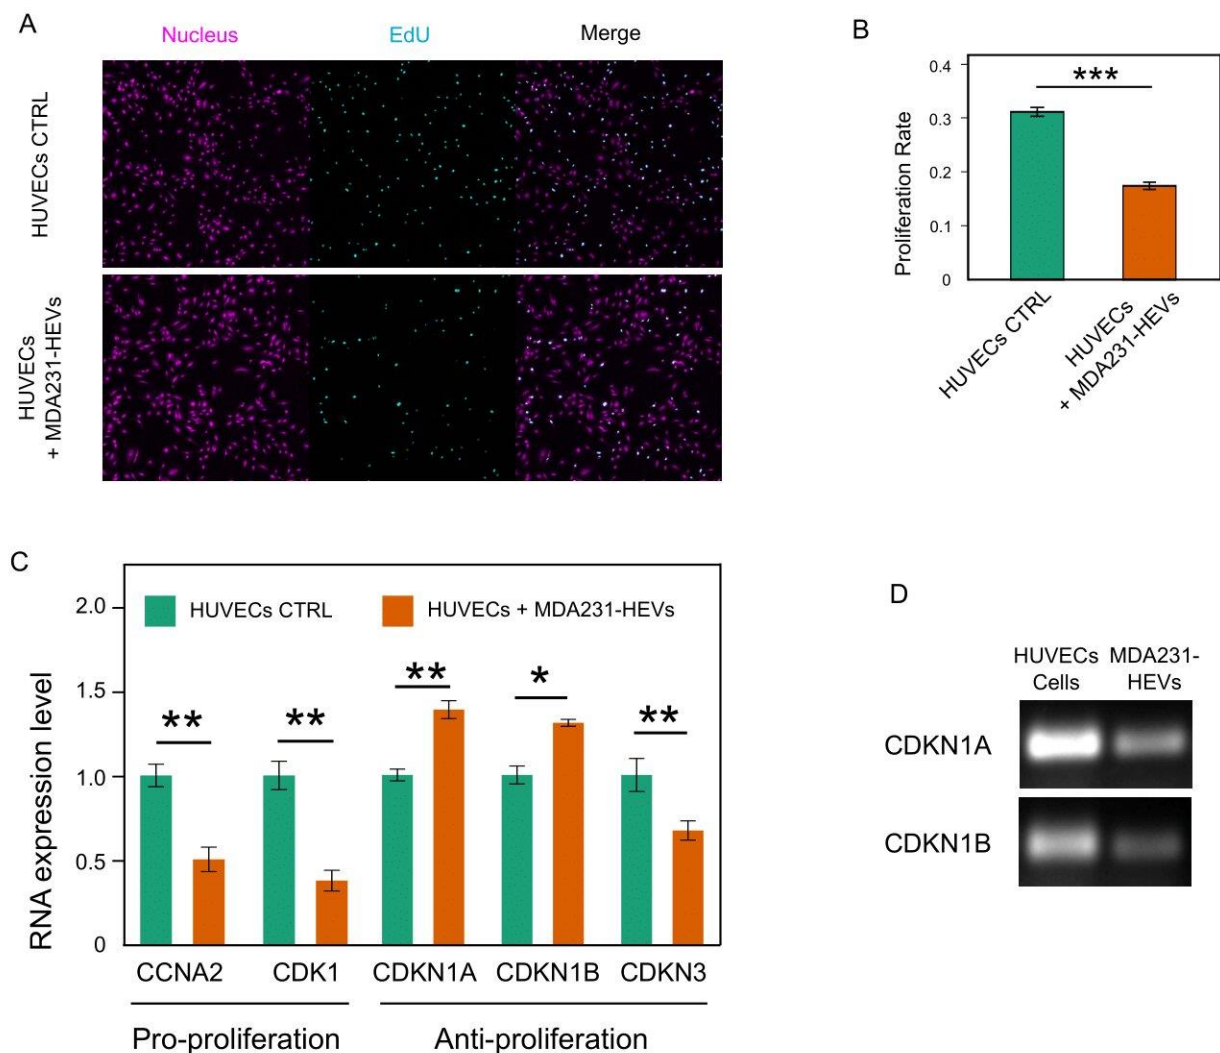

**Figure S5.** Cancer EVs suppress cell proliferation. **(A)** EdU proliferation assay of HUVECs in basal medium or treated with MDA231-HEVs for 24 h. **(B)** Proliferation rate of HUVECs were represented by the ratio of EdU+ cells to the Hoechst+ cells ( $n = 25$ ). **(C)** The expressions of proliferation-related genes that were significantly altered by the treatment of MDA231-HEVs ( $n = 3$ ). **(D)** The two upregulated CDK inhibitors, CDKN1A and CDKN1B, were carried by MDA231-HEVs. \*  $P < 0.05$ , \*\*  $P < 0.01$ , \*\*\*  $P < 0.001$  based on Mann-Whitney U test for **(B)**, or Student's  $t$  test for **(C)**. Error bars indicate the standard error of the mean (SEM) for **(B)** and **(C)**.



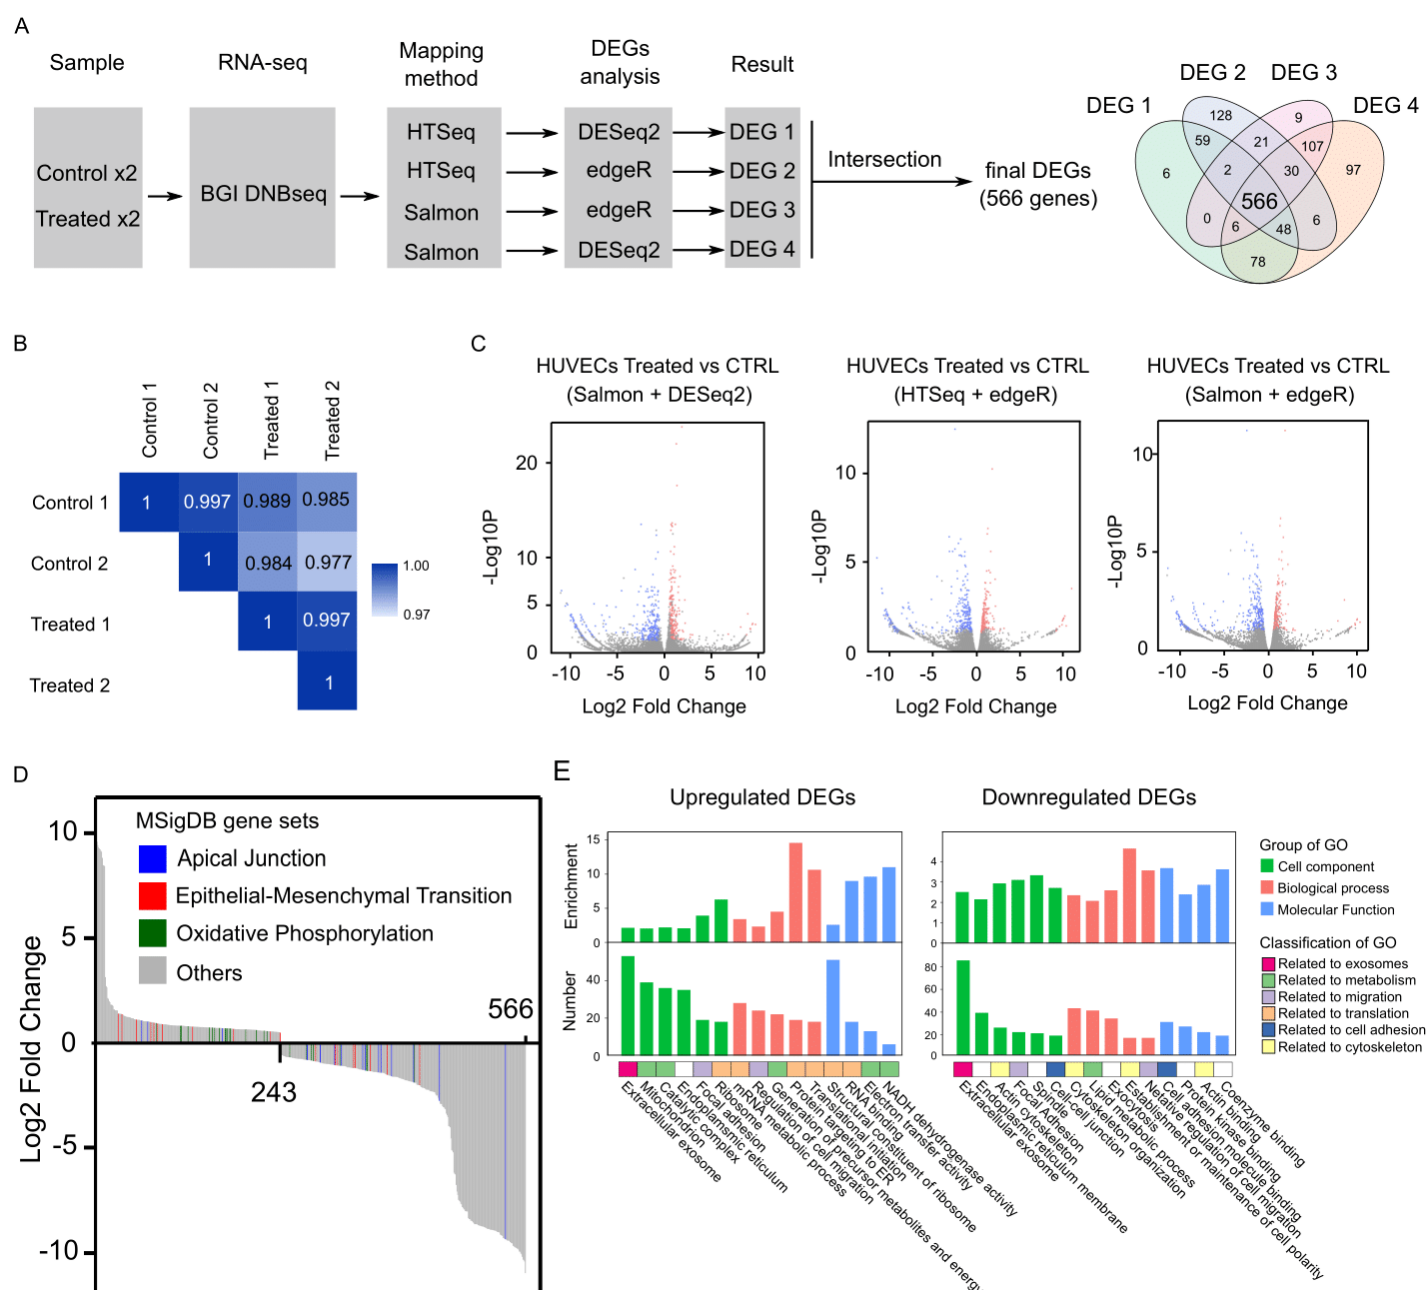

**Figure S6.** RNA-seq of HUVECs treated with cancer EVs. **(A)** Workflow of the RNA-seq data analysis. The final list of DEGs comprising 566 genes were acquired by intersecting four list of DEGs. **(B)** Correlation of four samples based on the expression profile shows the samples within each group were similar, while the correlation between control and EV-treated sample is relatively lower. **(C)** Volcano plot shows RNA-seq data of HUVECs with or without the treatment of MDA231-HEVs processed by pipelines of Salmon + DESeq2, HTSeq + edgeR, or Salmon + edgeR. **(D)** The plot of EV-induced fold changes of DEGs. Genes that belongs to Apical junction gene set, EMT gene set, or OP gene set were highlighted in blue, red, or green color, respectively. **(E)** Gene ontology analysis of DEGs. GO terms with >2 enrichment factor were ranked in gene number.

**Table S1.** Hypoxia-targeted gene panel.

| Gene Symbol in Paper | Official Gene Symbol | Official Full Name                       | Group of Function |
|----------------------|----------------------|------------------------------------------|-------------------|
| VEGFA                | VEGFA                | vascular endothelial growth factor A     | Angiogenesis      |
| CXCL12               | CXCL12               | C-X-C motif chemokine ligand 12          | Angiogenesis      |
| KITLG                | KITLG                | KIT ligand                               | Angiogenesis      |
| PDGFB                | PDGFB                | platelet derived growth factor subunit B | Angiogenesis      |
| PGF                  | PGF                  | placental growth factor                  | Angiogenesis      |

|          |          |                                                        |                              |
|----------|----------|--------------------------------------------------------|------------------------------|
| LOX      | LOX      | lysyl oxidase                                          | ECM stiffening               |
| P4HA1    | P4HA1    | prolyl 4-hydroxylase subunit alpha 1                   | ECM stiffening               |
| P4HA2    | P4HA2    | prolyl 4-hydroxylase subunit alpha 2                   | ECM stiffening               |
| LOXL2    | LOXL2    | lysyl oxidase like 2                                   | ECM stiffening               |
| PLOD2    | PLOD2    | procollagen-lysine,2-oxoglutarate 5-dioxygenase 2      | ECM stiffening               |
| MET      | MET      | MET proto-oncogene, receptor tyrosine kinase           | Cell motility                |
| SNAIL2   | SNAIL2   | snail family transcriptional repressor 2               | Cell motility                |
| ROCK1    | ROCK1    | Rho associated coiled-coil containing protein kinase 1 | Cell motility                |
| RHOA     | RHOA     | ras homolog family member A                            | Cell motility                |
| AXL      | AXL      | AXL receptor tyrosine kinase                           | Cell motility                |
| AMF      | GPI      | glucose-6-phosphate isomerase                          | Cell motility                |
| SNAIL1   | SNAIL1   | snail family transcriptional repressor 1               | Cell motility                |
| TWIST    | TWIST1   | twist family bHLH transcription factor 1               | Cell motility                |
| ZEB1     | ZEB1     | zinc finger E-box binding homeobox 1                   | Cell motility                |
| ZEB2     | ZEB2     | zinc finger E-box binding homeobox 2                   | Cell motility                |
| TCF3     | TCF3     | transcription factor 3                                 | Cell motility                |
| PLAUR    | PLAUR    | plasminogen activator, urokinase receptor              | Metastasis                   |
| ANGPTL4  | ANGPTL4  | angiopoietin like 4                                    | Metastasis                   |
| MMP14    | MMP14    | matrix metalloproteinase 14                            | Metastasis                   |
| ANGPT2   | ANGPT2   | angiopoietin 2                                         | Metastasis                   |
| CXCR4    | CXCR4    | C-X-C motif chemokine receptor 4                       | Metastasis                   |
| L1CAM    | L1CAM    | L1 cell adhesion molecule                              | Metastasis                   |
| MMP2     | MMP2     | matrix metalloproteinase 2                             | Metastasis                   |
| MMP9     | MMP9     | matrix metalloproteinase 9                             | Metastasis                   |
| IL8      | CXCL8    | C-X-C motif chemokine ligand 8                         | Cancer stem cell maintenance |
| CD47     | CD47     | CD47 molecule                                          | Cancer stem cell maintenance |
| IL6      | IL6      | interleukin 6                                          | Cancer stem cell maintenance |
| SOX2     | SOX2     | SRY-box transcription factor 2                         | Cancer stem cell maintenance |
| TAZ      | TAZ      | tafazzin                                               | Cancer stem cell maintenance |
| POU5F1   | POU5F1   | POU class 5 homeobox 1                                 | Cancer stem cell maintenance |
| MYC      | MYC      | MYC proto-oncogene, bHLH transcription factor          | Cancer stem cell maintenance |
| KLF4     | KLF4     | Kruppel like factor 4                                  | Cancer stem cell maintenance |
| NANOG    | NANOG    | Nanog homeobox                                         | Cancer stem cell maintenance |
| IL19     | IL19     | interleukin 19                                         | Cancer stem cell maintenance |
| ALKBH5   | ALKBH5   | alkB homolog 5, RNA demethylase                        | Cancer stem cell maintenance |
| GLUT1    | SLC2A1   | solute carrier family 2 member 1                       | Metabolism                   |
| PLIN2    | PLIN2    | perilipin 2                                            | Metabolism                   |
| BNIP3L   | BNIP3L   | BCL2 interacting protein 3 like                        | Metabolism                   |
| SHMT2    | SHMT2    | serine hydroxymethyltransferase 2                      | Metabolism                   |
| LONP1    | LONP1    | lon peptidase 1, mitochondrial                         | Metabolism                   |
| SLC16A4  | SLC16A4  | solute carrier family 16 member 4                      | Metabolism                   |
| PHGDH    | PHGDH    | phosphoglycerate dehydrogenase                         | Metabolism                   |
| PDK1     | PDK1     | pyruvate dehydrogenase kinase 1                        | Metabolism                   |
| MXI1     | MXI1     | MAX interactor 1, dimerization protein                 | Metabolism                   |
| SIAH2    | SIAH2    | siah E3 ubiquitin protein ligase 2                     | Metabolism                   |
| BNIP3    | BNIP3    | BCL2 interacting protein 3                             | Metabolism                   |
| LDHA     | LDHA     | lactate dehydrogenase A                                | Metabolism                   |
| CA9      | CA9      | carbonic anhydrase 9                                   | Metabolism                   |
| FABP3    | FABP3    | fatty acid binding protein 3                           | Metabolism                   |
| COX4I2   | COX4I2   | cytochrome c oxidase subunit 4I2                       | Metabolism                   |
| FABP7    | FABP7    | fatty acid binding protein 7                           | Metabolism                   |
| NDUFA4L2 | NDUFA4L2 | NDUFA4 mitochondrial complex associated like 2         | Metabolism                   |
| NHE1     | SLC9A1   | solute carrier family 9 member A1                      | Metabolism                   |
| NT5E     | NT5E     | 5'-nucleotidase ecto                                   | Immune evasion               |
| CD39     | ENTPD1   | ectonucleoside triphosphate diphosphohydrolase 1       | Immune evasion               |
| PDL1     | CD274    | CD274 molecule                                         | Immune evasion               |

**Table S2.** Primer sequences for RT-qPCR.

| Gene Symbol                        | Forward                       | Reverse                        | Product Length (bp) |
|------------------------------------|-------------------------------|--------------------------------|---------------------|
| <b>Hypoxia-targeted gene panel</b> |                               |                                |                     |
| ALKBH5                             | 5'-CGGCGAAGGCTACACTTACG-3'    | 5'-CCACCAGCTTTTGGATCACCA-3'    | 128                 |
| AMF                                | 5'-CCGCGTCTGGTATGTCTCC-3'     | 5'-CCTGGGTAGTAAAGGTCTTGA-3'    | 113                 |
| ANGPT2                             | 5'-ACCCCACTGTTGCTAAAGAAGA-3'  | 5'-CCATCCTCACGTCGCTGAATA-3'    | 184                 |
| ANGPTL4                            | 5'-GGCTCAGTGGACTTCAACCG-3'    | 5'-CCGTGATGCTATGCACCTTCT-3'    | 103                 |
| AXL                                | 5'-CCGTGGACCTACTCTGGCT-3'     | 5'-CCTTGGCGTTATGGGCTTC-3'      | 132                 |
| BNIP3                              | 5'-CAGGGCTCCTGGGTAGAACT-3'    | 5'-CTACTCCGTCCAGACTCATGC-3'    | 131                 |
| BNIP3L                             | 5'-TTGGATGCACAACATGAATCAGG-3' | 5'-TCTTCTGACTGAGAGCTATGGTC-3'  | 140                 |
| CA9                                | 5'-GGATCTACCTACTGTTGAGGCT-3'  | 5'-CATAGCGCCAATGACTCTGGT-3'    | 98                  |
| CD39                               | 5'-AGGTGCCTATGGCTGGATTAC-3'   | 5'-CCAAAGCTCCAAAGGTTTCCT-3'    | 116                 |
| CD47                               | 5'-TCCGGTGGTATGGATGAGAAA-3'   | 5'-ACCAAGGCCAGTAGCATTCTT-3'    | 129                 |
| COX4I2                             | 5'-CCGTCGCTCCAATGAGTGG-3'     | 5'-CGTCCGTCAAGGTGATCGG-3'      | 125                 |
| CXCL12                             | 5'-ATTCTCAACACTCCAACTGTGC-3'  | 5'-ACTTTAGCTTCGGGTCAATGC-3'    | 88                  |
| CXCR4                              | 5'-ACGCCACCAACAGTCAGAG-3'     | 5'-AGTCGGGAATAGTCAGCAGGA-3'    | 96                  |
| FABP3                              | 5'-TGGAGTTCGATGAGACAACAGC-3'  | 5'-CTCTTGCCCGTCCCATTTCTG-3'    | 101                 |
| FABP7                              | 5'-GCACATTCAAGAACACGGAGA-3'   | 5'-CACATCACCAAAAGTAAGGGTCA-3'  | 203                 |
| GLUT1                              | 5'-ATTGGCTCCGGTATCGTCAAC-3'   | 5'-GCTCAGATAGGACATCCAGGGTA-3'  | 174                 |
| IL19                               | 5'-TCCTGGCGTTCTACGTGGA-3'     | 5'-TGACATTGCCGCAGAGTTTTC-3'    | 124                 |
| IL6                                | 5'-ACTCACCTCTTCAGAACGAATTG-3' | 5'-CCATCTTTGGAAGGTTTCAAGTTG-3' | 149                 |
| IL8                                | 5'-ACTGAGAGTGATTGAGAGTGGAC-3' | 5'-AACCTCTGCACCCAGTTTTC-3'     | 112                 |
| KITLG                              | 5'-AATCCTCTCGTCAAACTGAAGG-3'  | 5'-CCATCTCGCTTATCCAACAATGA-3'  | 163                 |
| KLF4                               | 5'-CGGACATCAACGACGTGAG-3'     | 5'-GACGCCTTCAGCACGAACT-3'      | 139                 |
| L1CAM                              | 5'-TGTCATCACGGAACAGTCTCC-3'   | 5'-CTGGCAAAGCAGCGGTAGAT-3'     | 246                 |
| LDHA                               | 5'-TTGACCTACGTGGCTTGAAG-3'    | 5'-GGTAACGGAATCGGGCTGAAT-3'    | 91                  |
| LONP1                              | 5'-GACGATCCCCGATGTGTTTCC-3'   | 5'-GGGCGAGACGAACTTTCCTT-3'     | 137                 |
| LOX                                | 5'-CGGCGGAGGAAAACCTGTCT-3'    | 5'-TCGGCTGGGTAAGAAATCTGA-3'    | 128                 |
| LOXL2                              | 5'-GGGTGGAGGTGTACTATGATGG-3'  | 5'-CTTGCCGTAGGAGGAGCTG-3'      | 137                 |
| MET                                | 5'-AGCAATGGGGAGTGTAAGAGG-3'   | 5'-CCCAGTCTTGTAAGTCAAGCAAC-3'  | 198                 |
| MMP14                              | 5'-CATCTGTGACGGGAACCTTTGA-3'  | 5'-GGCAGTGTTGATGGACGCA-3'      | 163                 |
| MMP2                               | 5'-GATACCCCTTTGACGGTAAGGA-3'  | 5'-CCTTCTCCCAAGGTCCATAGC-3'    | 112                 |
| MMP9                               | 5'-GGGACGCAGACATCGTCATC-3'    | 5'-TCGTCATCGTCGAAATGGGC-3'     | 139                 |
| MXI1                               | 5'-GCGCCTTTGTGTTAGAACGCTT-3'  | 5'-AATGCTGTCCATTCGTATTCGT-3'   | 235                 |
| MYC                                | 5'-GGCTCCTGGCAAAAGGTCA-3'     | 5'-CTGCGTAGTTGTGCTGATGT-3'     | 119                 |
| NANOG                              | 5'-TTTGTGGGCTGAAGAAAACCT-3'   | 5'-AGGGCTGTCTCTGAATAAGCAG-3'   | 116                 |
| NDUFA4L2                           | 5'-ATGATCGGCTTAATCTGCCTG-3'   | 5'-TCCGGGTGTTCTTTCTGTCC-3'     | 104                 |
| NHE1                               | 5'-ACCACGAGAACGCTCGATTG-3'    | 5'-ACGTGTGTGTAGTCGATGCC-3'     | 144                 |
| NT5E                               | 5'-CCAGTACCAGGGCACTATCTG-3'   | 5'-TGGCTCGATCAGTCCTTCCA-3'     | 136                 |
| P4HA1                              | 5'-CCAAAGCTCTGTTACGTCTCC-3'   | 5'-AGTCTCAGCCGTTAGAAAAGA-3'    | 108                 |
| P4HA2                              | 5'-CAAAGTGGTGAAGCGGCTAAA-3'   | 5'-GCACAGAGAGGTTGGCGATA-3'     | 95                  |
| PDGFB                              | 5'-CTCGATCCGCTCCTTTGATGA-3'   | 5'-CGTTGGTGGGCTCTATGAG-3'      | 239                 |
| PDK1                               | 5'-GAGAGCCACTATGGAACACCA-3'   | 5'-GGAGGTCTCAACACGAGGT-3'      | 187                 |
| PDL1                               | 5'-TGGCATTTGCTGAACGCATTT-3'   | 5'-TGCAGCCAGGTCTAATTGTTTT-3'   | 120                 |
| PGF                                | 5'-GAACGGCTCGTCAGAGGTG-3'     | 5'-ACAGTGCAGATTCTCATCGCC-3'    | 187                 |
| PHGDH                              | 5'-CTGCGGAAAGTGCTCATCAGT-3'   | 5'-TGGCAGAGCGAACAATAAGGC-3'    | 154                 |
| PLAUR                              | 5'-TGTAAGACCAACGGGGATTGC-3'   | 5'-AGCCAGTCCGATAGCTCAGG-3'     | 166                 |
| PLIN2                              | 5'-TTGCAGTTGCCAATACCTATGC-3'  | 5'-CCAGTCACAGTAGTCGTCACA-3'    | 148                 |
| PLOD2                              | 5'-TTATTGAGCAACCAACCCCTTT-3'  | 5'-GGCTTCCGCTTGACTTAGATTT-3'   | 206                 |
| POU5F1                             | 5'-GGGAGATTGATAACTGGTGTGTT-3' | 5'-GTGTATATCCCAGGGTGATCCTC-3'  | 144                 |
| RHOA                               | 5'-GGAAAGCAGGTAGAGTTGGCT-3'   | 5'-GGCTGTGATGGAAGAAACACAT-3'   | 118                 |
| ROCK1                              | 5'-GGTGGTTCGGTTGGGGTATTTT-3'  | 5'-CGCCCTAACCTCACTTCCC-3'      | 196                 |
| SHMT2                              | 5'-CCCTTCTGCAACCTCACGAC-3'    | 5'-TGAGCTTATAGGGCATAGACTCG-3'  | 135                 |
| SIAH2                              | 5'-CGCCAGAAGTTGAGCTGCT-3'     | 5'-TGGTGGCATACTTACAGGGAA-3'    | 115                 |
| SLC16A4                            | 5'-AGGTATCCTTGAGACGGTCAG-3'   | 5'-CAAGCAGGTTAGTGATGCCG-3'     | 119                 |
| SNAIL1                             | 5'-TCGGAAGCCTAACTACAGCGA-3'   | 5'-AGATGAGCATTGGCAGCGAG-3'     | 140                 |



|                                           |                               |                               |     |
|-------------------------------------------|-------------------------------|-------------------------------|-----|
| <b>SNAIL2</b>                             | 5'-TGTGACAAGGAATATGTGAGCC-3'  | 5'-TGAGCCCTCAGATTTGACCTG-3'   | 203 |
| <b>SOX2</b>                               | 5'-GCCGAGTGGAACCTTTGTGCG-3'   | 5'-GGCAGCGTGACTTATCCTTCT-3'   | 155 |
| <b>TAZ</b>                                | 5'-CACCGTGTCCAATCACCAGTC-3'   | 5'-TCCAACGCATCAACTTCAGGT-3'   | 95  |
| <b>TCF3</b>                               | 5'-ACGAGCGTATGGGCTACCA-3'     | 5'-GTTATTGCTTGAGTGATCCGGG-3'  | 233 |
| <b>TWIST</b>                              | 5'-GTCCGCAGTCTTACGAGGAG-3'    | 5'-GCTTGAGGGTCTGAATCTTGCT-3'  | 156 |
| <b>VEGFA</b>                              | 5'-AGGGCAGAATCATCACGAAGT-3'   | 5'-AGGGTCTCGATTGGATGGCA-3'    | 75  |
| <b>ZEB1</b>                               | 5'-CAGCTTGATACCTGTGAATGGG-3'  | 5'-TATCTGTGGTCGTGTGGGACT-3'   | 106 |
| <b>ZEB2</b>                               | 5'-CAAGAGGCGCAAACAAGCC-3'     | 5'-GGTTGGCAATACCGTCATCC-3'    | 128 |
| <b>Cell cycle-related genes</b>           |                               |                               |     |
| <b>CCNA1</b>                              | 5'-ACATGGATGAACTAGAGCAGGG-3'  | 5'-GAGTGTGCCGGTGTCTACTT-3'    | 95  |
| <b>CCNA2</b>                              | 5'-CGCTGGCGGTACTGAAGTC-3'     | 5'-GAGGAACGGTGACATGCTCAT-3'   | 120 |
| <b>CCNB1</b>                              | 5'-CCTGCCTGCAACAGTACCC-3'     | 5'-CCAACACGATCTCTGGTCGC-3'    | 115 |
| <b>CCND1</b>                              | 5'-GCTGCGAAGTGGAACCATC-3'     | 5'-CCTCCTTCTGCACACATTTGAA-3'  | 135 |
| <b>CCND2</b>                              | 5'-ACCTTCCGCAGTGCTCCTA-3'     | 5'-CCCAGCCAAGAAACGGTCC-3'     | 161 |
| <b>CCND3</b>                              | 5'-TACCCGCCATCCATGATCG-3'     | 5'-AGGCAGTCCACTTCAGTGC-3'     | 128 |
| <b>CCNE1</b>                              | 5'-ACTCAACGTGCAAGCCTCG-3'     | 5'-GCTCAAGAAAGTGCTGATCCC-3'   | 141 |
| <b>CCNE2</b>                              | 5'-TCAAGACGAAGTAGCCGTTTAC-3'  | 5'-TGACATCCTGGGTAGTTTTCTC-3'  | 115 |
| <b>CDK1</b>                               | 5'-AAACTACAGGTCAAGTGGTAGCC-3' | 5'-TCCTGCATAAGCACATCCTGA-3'   | 148 |
| <b>CDK2</b>                               | 5'-CCAGGAGTTACTTCTATGCCTGA-3' | 5'-TTCATCCAGGGGAGGTACAAC-3'   | 90  |
| <b>CDK4</b>                               | 5'-ATGGCTACCTCTCGATATGAGC-3'  | 5'-CATTGGGGACTCTCACACTCT-3'   | 124 |
| <b>CDK6</b>                               | 5'-CCAGATGGCTCTAACCTCAGT-3'   | 5'-AACTTCCACGAAAAAGAGGCTT-3'  | 152 |
| <b>CDK7</b>                               | 5'-ATGGCTCTGGACGTGAAGTCT-3'   | 5'-GCGACAATTTGGTTGGTGTTT-3'   | 116 |
| <b>CDKN1A</b>                             | 5'-TGTCCGTCAGAACCCATGC-3'     | 5'-AAAGTCGAAGTTCCATCGCTC-3'   | 139 |
| <b>CDKN1B</b>                             | 5'-TAATTGGGGCTCCGGCTAACT-3'   | 5'-TGCAGGTCGCTTCCTTATTCC-3'   | 116 |
| <b>CDKN1C</b>                             | 5'-ACGAGGAGCTGAGTCGTGAG-3'    | 5'-CTGTCCACCTCGGTCCACT-3'     | 136 |
| <b>CDKN2A</b>                             | 5'-ATGGAGCCTTCGGCTGACT-3'     | 5'-GTAAGTATTCGGTGCGTTGGG-3'   | 108 |
| <b>CDKN2B</b>                             | 5'-GAATGCGCGAGGAGAACA-3'      | 5'-CATCATCATGACCTGGATCGC-3'   | 170 |
| <b>CDKN2C</b>                             | 5'-GGGGACCTAGAGCAACTTACT-3'   | 5'-CAGCGCAGTCCTTCCAAAT-3'     | 81  |
| <b>CDKN2D</b>                             | 5'-AGTCCAGTCCATGACGCAG-3'     | 5'-ATCAGGCACGTTGACATCAGC-3'   | 87  |
| <b>CDKN3</b>                              | 5'-GGACTCTGACATAGCCAGC-3'     | 5'-CTGTATTGCCCCGGATCCTC-3'    | 209 |
| <b>Angiogenesis pathway-related genes</b> |                               |                               |     |
| <b>ANGPT1</b>                             | 5'-TCGTGAGAGTACGACAGACCA-3'   | 5'-TCTCCGACTTCATGTTTTCCAC-3'  | 173 |
| <b>ANGPT2</b>                             | 5'-ACCCCACTGTTGCTAAAGAAGA-3'  | 5'-CCATCCTCACGTCGCTGAATA-3'   | 184 |
| <b>TIE1</b>                               | 5'-AAGCAGACAGACGTGATCTGG-3'   | 5'-GCACGATGAGCCGAAAGAAG-3'    | 184 |
| <b>TIE2</b>                               | 5'-CAGGATACGAACCATGAAGATGC-3' | 5'-GGGGCACTGAATGGATGAAG-3'    | 167 |
| <b>VEGFA</b>                              | 5'-AGGGCAGAATCATCACGAAGT-3'   | 5'-AGGGTCTCGATTGGATGGCA-3'    | 75  |
| <b>VEGFR1</b>                             | 5'-GAAAACGCATAATCTGGGACAGT-3' | 5'-GCGTGGTGTGCTTATTTGGA-3'    | 173 |
| <b>VEGFR2</b>                             | 5'-GTGATCGGAAATGACACTGGAG-3'  | 5'-CATGTTGGTCACTAACAGAAGCA-3' | 124 |
| <b>Other genes</b>                        |                               |                               |     |
| <b>ATP5F1E</b>                            | 5'-GGCTGGACTCAGCTACATCC-3'    | 5'-TTACGTTGCTGCCAGAAGTCT-3'   | 110 |
| <b>ATP5PF</b>                             | 5'-GTTCTCCTCTGTCAATTCGGTCA-3' | 5'-TCCAGATGTCTGTCGCTTAGAT-3'  | 151 |
| <b>CALD1</b>                              | 5'-TGGAGGTGAATGCCCAGAAC-3'    | 5'-GAAGGCGTTTTTGGCGTCTTT-3'   | 138 |
| <b>COL4A1</b>                             | 5'-GGGATGCTGTTGAAAGGTGAA-3'   | 5'-GGTGGTCCGGTAAATCCTGG-3'    | 113 |
| <b>COL5A2</b>                             | 5'-GACTGTGCCGACCCTGTAAC-3'    | 5'-CCTGGACGACCACGTATGC-3'     | 155 |
| <b>COX6A1</b>                             | 5'-AGTTGGTGTGTCTCGGTTTC-3'    | 5'-GTGAGAGTCTTCCACATGCGA-3'   | 117 |
| <b>COX6C</b>                              | 5'-CCAAAACCTCGGATGCGTG-3'     | 5'-AAATCTGCGTATGCCTTCTTCT-3'  | 137 |
| <b>COX7A2</b>                             | 5'-CTCGGAGGTAGTTCCGGTTC-3'    | 5'-TCTGCCCAATCTGACGAAGAG-3'   | 122 |
| <b>COX7B</b>                              | 5'-CTTGGTCAAAAGCGCACTAAATC-3' | 5'-AAAATCAGGTGTACGTTTCTGGT-3' | 91  |
| <b>COX7C</b>                              | 5'-GGTCCGTAGGAGCCACTATGA-3'   | 5'-GTGTCTTACTACAAGGAAGGGTG-3' | 136 |
| <b>CTHRC1</b>                             | 5'-CAATGGCATTCCGGGTACAC-3'    | 5'-GTACACTCCGCAATTTCCCAA-3'   | 168 |
| <b>ETFA</b>                               | 5'-GTTTTCTGTCCGTGGAACATCC-3'  | 5'-ATTTCTGGTCAAGCCACTCTG-3'   | 116 |
| <b>GFP</b>                                | 5'-TCTATATCATGGCCGACAAGC-3'   | 5'-GGTGTCTGCTGGTAGTGG-3'      | 110 |
| <b>HTRA1</b>                              | 5'-TCCCAACAGTTTGCGCCATAA-3'   | 5'-CCGGCACCTCTCGTTTAGAAA-3'   | 119 |
| <b>IL32</b>                               | 5'-TGGCGGCTTATTATGAGGAGC-3'   | 5'-CTCGGCACCGTAATCCATCTC-3'   | 78  |
| <b>ITGAV</b>                              | 5'-ATCTGTGAGGTGGAACAGGA-3'    | 5'-TGGAGCATACTCAACAGTCTTG-3'  | 136 |
| <b>LGALS1</b>                             | 5'-CTGTGCCTGCACTTCAACC-3'     | 5'-CATCTGGCAGCTTGACGGT-3'     | 187 |

|               |                               |                               |     |
|---------------|-------------------------------|-------------------------------|-----|
| <b>MGP</b>    | 5'-TCCGAGAACGCTCTAAGCCT-3'    | 5'-GCAAAGTCTGTAGTCATCACAGG-3' | 65  |
| <b>NDUFA1</b> | 5'-GCGTACATCCACAGGTTCACT-3'   | 5'-GCGCCTATCTCTTTCCATCAGA-3'  | 90  |
| <b>NDUFA4</b> | 5'-ATGCTCCGCCAGATCATCG-3'     | 5'-TGCCAGACGCAAGAGATACAG-3'   | 111 |
| <b>NDUFB4</b> | 5'-ATGTCGTTCCCAAAGTATAAGCC-3' | 5'-GAAGCAGGTACTCTCGTTTCAG-3'  | 148 |
| <b>NDUFS6</b> | 5'-TTCGGTTTGTAGGTCGTCAGA-3'   | 5'-CCATCGCACGCTATCACCC-3'     | 106 |
| <b>SUCLA2</b> | 5'-GCTGCCTAGTAAATGGTGCTG-3'   | 5'-GTTGACCAGAATAGCCAGTACC-3'  | 173 |
| <b>TIMM8B</b> | 5'-TCACTTCATGGAGTTATGTTGGG-3' | 5'-AGACAATTTTCAGTGCGAGAGTC-3' | 78  |
| <b>TPM1</b>   | 5'-GCCGACGTAGCTTCTCTGAAC-3'   | 5'-TTTGGGCTCGACTCTCAATGA-3'   | 160 |
| <b>UQCRB</b>  | 5'-GGTAAGCAGGCCGTTTCAG-3'     | 5'-AGGTCCAGTGCCCTCTTAATG-3'   | 200 |
| <b>UQCRH</b>  | 5'-GAGGACGAGCAAAAGATGCTT-3'   | 5'-CGAGAGGAATCACGCTCATCA-3'   | 170 |
| <b>UQCRQ</b>  | 5'-ATCCGCACGTCTTCACTAAAG-3'   | 5'-TGGATCTCTCGAACTCTTCAGTC-3' | 132 |
| <b>VIM</b>    | 5'-GACGCCATCAACACCGAGTT-3'    | 5'-CTTTGTCGTTGGTTAGCTGGT-3'   | 238 |

**Dataset S1 (separate file).** RT-qPCR quantification results of cellular and exosomal mRNAs.
