# Supplementary material for: Distinct mRNAs in Cancer Extracellular Vesicles Activate Angiogenesis and Alter Transcriptome of Vascular Endothelial Cells
Source: MDPI journal article supplement (doi:10.3390/cancers13092009), 2021-04-22
Supplement: s1 [file s1]

Figure 1B

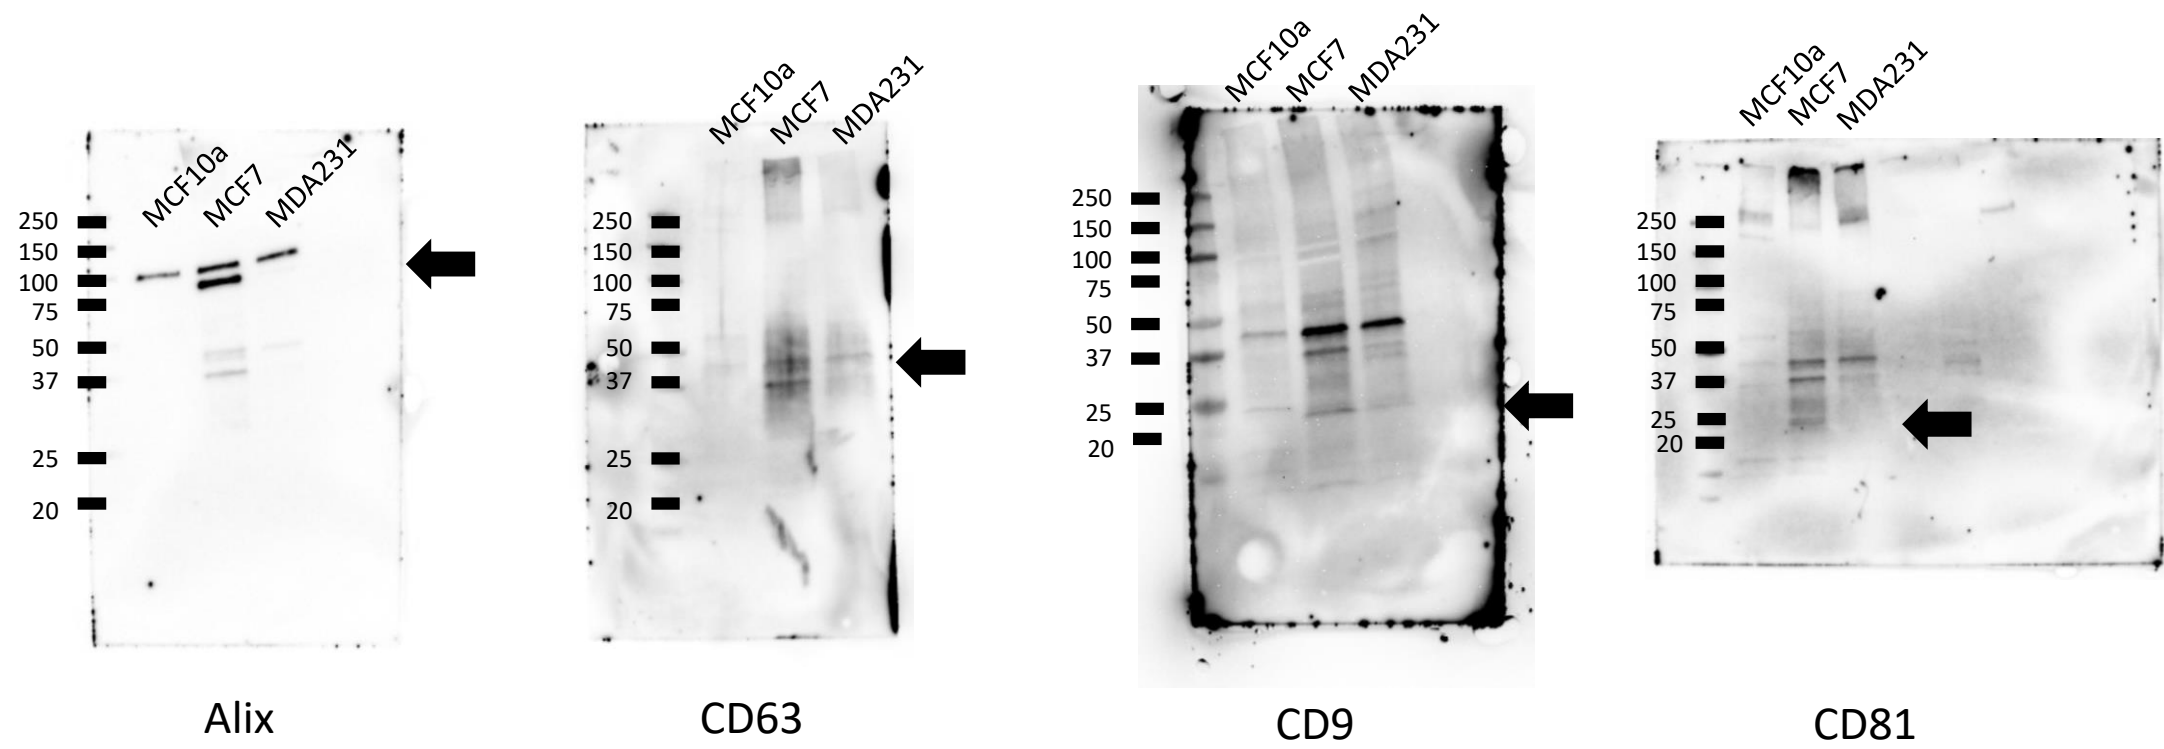

Figure 5D

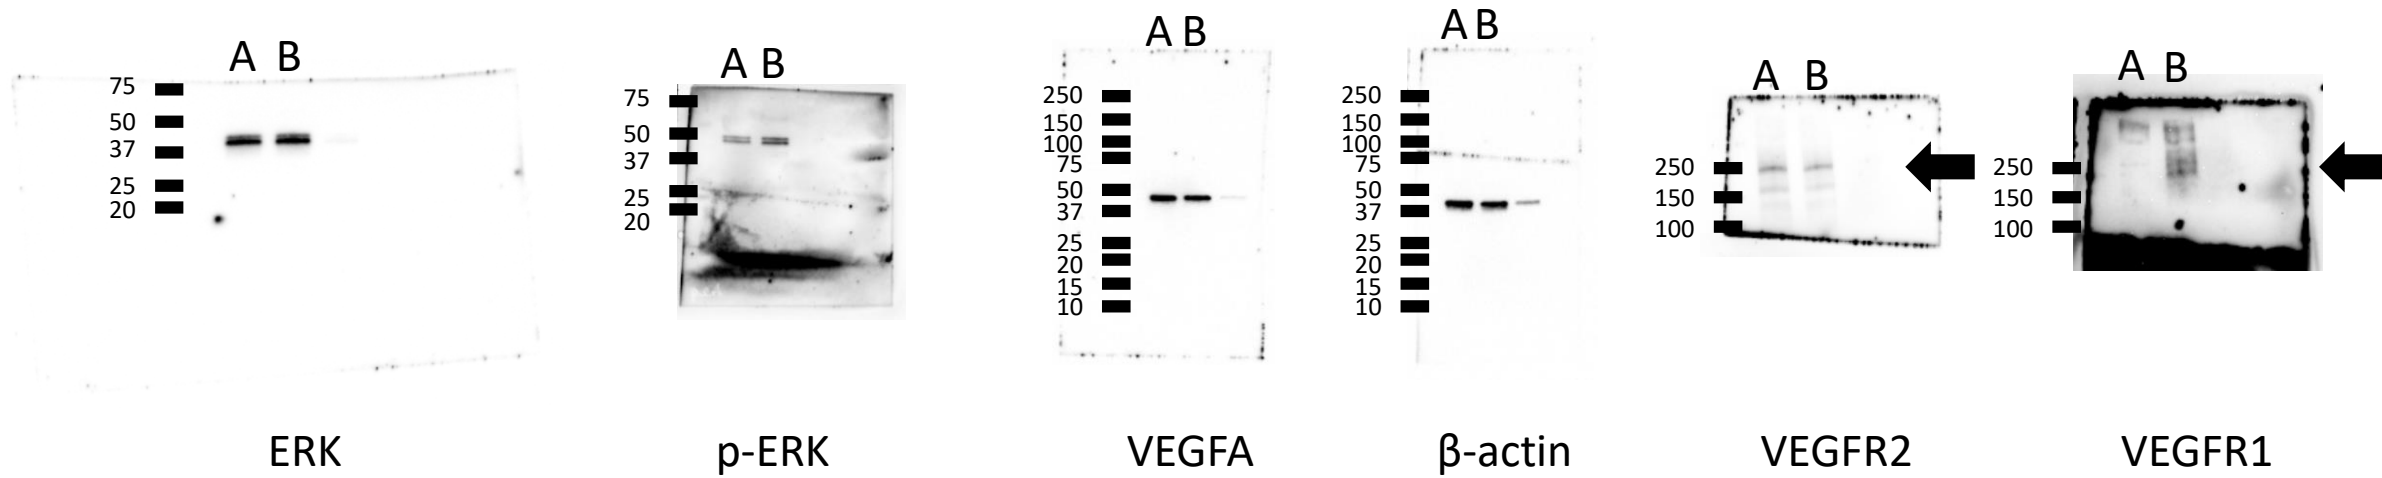

Sample in lane A: whole cell lysates of HUVECs not treated by MDA231-HEVs

Sample in lane B: whole cell lysates of HUVECs treated by MDA231-HEVs

Figure S3E

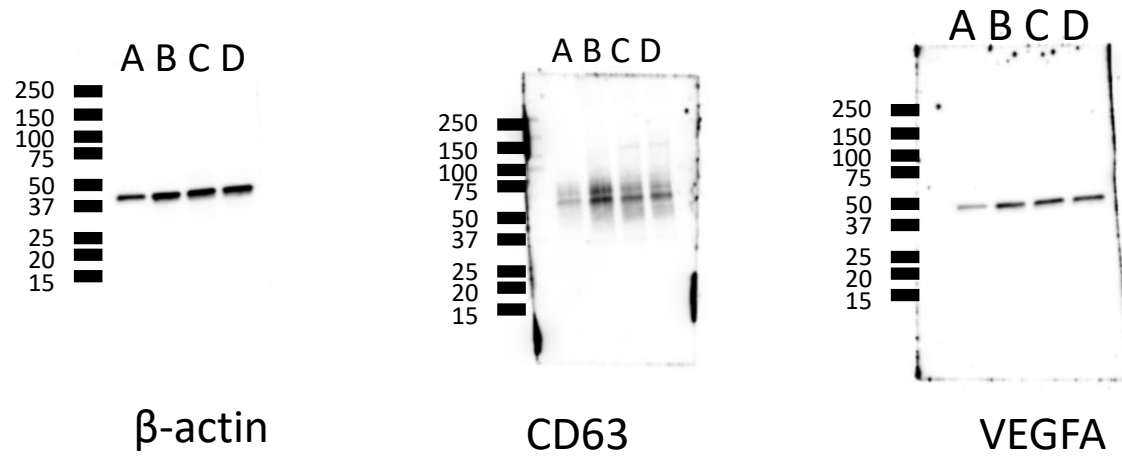

Sample in lane A: MDA231-NEVs

Sample in lane B: MDA231-HEVs

Sample in lane C: whole cell lysates of normoxic MDA231 cells

Sample in lane D: whole cell lysates of hypoxic MDA231 cells
